# Supplementary material
Source: publisher figshare collection journal article supplement (https://tandf.figshare.com/articles/dataset/_/22177989)
Supplement: Supplementary file 1 [file 1]

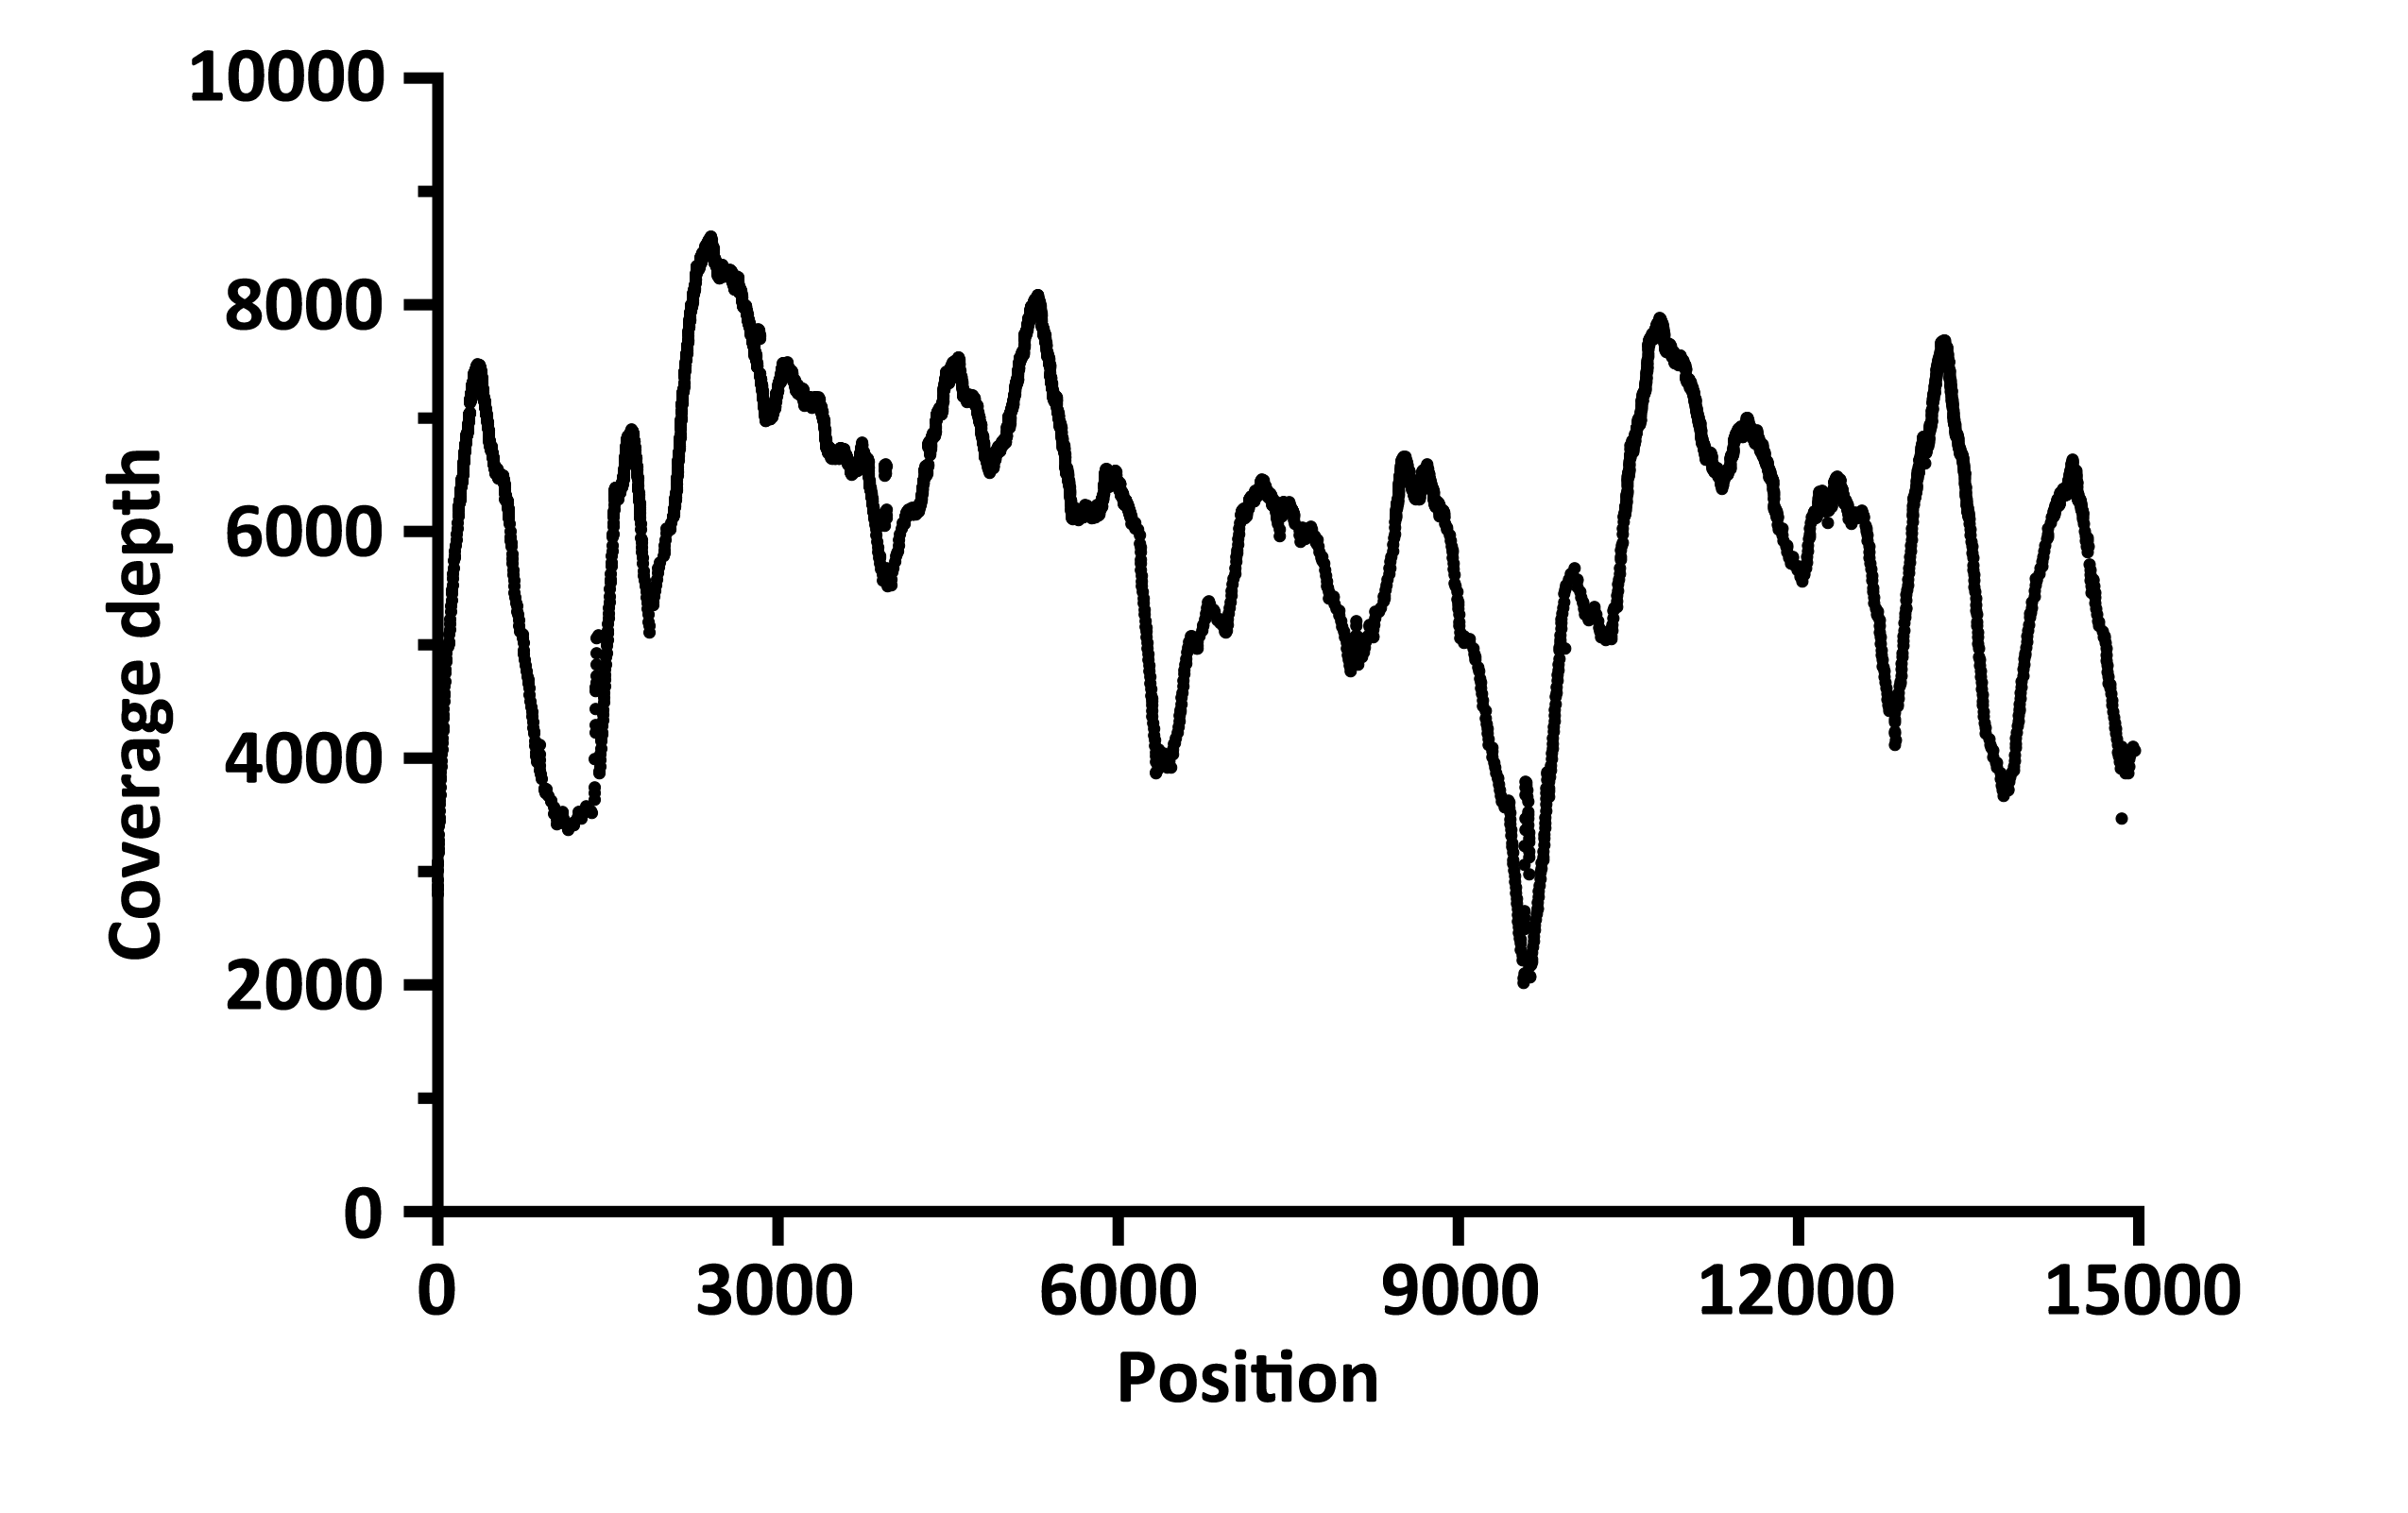


Figure S1. The coverage depth for *S. depravata* mitochondrion genome using the software mosdepth v0.3.3 base on the analysis results using BWA-MEM v0.7.17-r1188 and Samtools v1.13. The mean coverage depth is in the range 1951 to 13697.
